# Supplementary material for: Outcomes From Health Information Exchange: Systematic Review and Future Research Needs
Source: PubMed Central journal article supplement (PMC4704923; doi:10.2196/medinform.5215), 2015-12-15
Supplement: medinform_v3i4e39_app1.pdf [file medinform_v3i4e39_app1.pdf]

**Multimedia Appendix 1.** Studies of health information exchange included for assessing outcomes.

|                                              | Study                   | Location                   | Setting                   | Health information exchange type | Study type      | Risk of bias   | Direction of result(s) | Outcome(s) assessed                    | Results of health information exchange                                                                                                                                                     |
|----------------------------------------------|-------------------------|----------------------------|---------------------------|----------------------------------|-----------------|----------------|------------------------|----------------------------------------|--------------------------------------------------------------------------------------------------------------------------------------------------------------------------------------------|
| <b>Laboratory testing or cost of testing</b> |                         |                            |                           |                                  |                 |                |                        |                                        |                                                                                                                                                                                            |
|                                              | Mäenpää et al 2011 [23] | Tampere, Finland           | OP <sup>a</sup>           | Q <sup>b</sup>                   | RC <sup>c</sup> | L <sup>d</sup> | Negative               | Laboratory testing                     | Increased testing during period of health information exchange (HIE) implementation (19.0% for primary care physicians and 7.0% for specialist physicians per total patient appointments). |
|                                              | Ross et al 2013 [24]    | Mesa County, Colorado      | OP <sup>a</sup>           | Q <sup>b</sup>                   | RC <sup>c</sup> | L <sup>d</sup> | Beneficial             | Rate of increase in laboratory testing | After HIE implementation, reduction in rising rate of testing, without overall cost savings                                                                                                |
|                                              | Carr et al 2014 [54]    | Charleston, South Carolina | Emergency department (ED) | Q <sup>b</sup>                   | CS <sup>e</sup> | M <sup>f</sup> | Beneficial             | Laboratory testing                     | US \$462 in savings over 3 months through averted laboratory testing in EDs                                                                                                                |
|                                              | Frisse et al 2012 [25]  | Memphis, Tennessee         | ED                        | Q <sup>b</sup>                   | RC <sup>c</sup> | M <sup>f</sup> | Beneficial             | Laboratory testing                     | Odds ratio (OR) of testing among patients for whom HIE accessed was 0.880 (95% CI 0.828-0.935)                                                                                             |

|                          | Study                  | Location             | Setting | Health information exchange type | Study type      | Risk of bias   | Direction of result(s) | Outcome(s) assessed | Results of health information exchange                                                                                                                                                                               |
|--------------------------|------------------------|----------------------|---------|----------------------------------|-----------------|----------------|------------------------|---------------------|----------------------------------------------------------------------------------------------------------------------------------------------------------------------------------------------------------------------|
|                          | Tzeel et al 2011 [26]  | Milwaukee, Wisconsin | ED      | Q <sup>b</sup>                   | RC <sup>c</sup> | L <sup>d</sup> | Beneficial             | ED visit costs      | 23% fewer laboratory testing procedures (statistical significance not reported) in propensity-matched group of patients for whom HIE was used                                                                        |
|                          | Winden et al 2014 [55] | Minnesota            | ED      | Q <sup>b</sup>                   | CS <sup>e</sup> | M <sup>f</sup> | Beneficial             | Laboratory testing  | 96 instances of duplicate laboratory testing averted in 1488 patient encounters                                                                                                                                      |
| <b>Radiology testing</b> |                        |                      |         |                                  |                 |                |                        |                     |                                                                                                                                                                                                                      |
|                          | Bailey et al 2013 [27] | Memphis, Tennessee   | ED      | Q <sup>b</sup>                   | RC <sup>c</sup> | L <sup>d</sup> | Beneficial             | Use of neuroimaging | HIE usage associated with decreased diagnostic imaging (OR 0.38; 95% CI 0.29-0.50) and increased adherence to evidence-based guidelines (OR 1.33; 95% CI 1.02-1.73), although no significant change in overall costs |

|  | <b>Study</b>           | <b>Location</b>            | <b>Setting</b> | <b>Health information exchange type</b> | <b>Study type</b> | <b>Risk of bias</b> | <b>Direction of result(s)</b> | <b>Outcome(s) assessed</b> | <b>Results of health information exchange</b>                                                                                                                                                                                            |
|--|------------------------|----------------------------|----------------|-----------------------------------------|-------------------|---------------------|-------------------------------|----------------------------|------------------------------------------------------------------------------------------------------------------------------------------------------------------------------------------------------------------------------------------|
|  | Bailey et al 2013 [28] | Memphis, Tennessee         | ED             | Q <sup>b</sup>                          | RC <sup>c</sup>   | L <sup>d</sup>      | Beneficial                    | Use of back imaging        | HIE usage associated with reduced repeat imaging for back pain (OR 0.36; 95% CI 0.18-0.71), but no change in cost due to higher use of CT <sup>g</sup> scans with HIE access                                                             |
|  | Carr et al 2014 [54]   | Charleston, South Carolina | ED             | Q <sup>b</sup>                          | CS <sup>e</sup>   | M <sup>f</sup>      | Beneficial                    | Use of radiology testing   | US \$161,000 in savings over 3 months through averted radiologic testing in EDs                                                                                                                                                          |
|  | Frisse et al 2012 [25] | Memphis, Tennessee         | ED             | Q <sup>b</sup>                          | RC <sup>c</sup>   | M <sup>f</sup>      | Beneficial                    | Use of radiology testing   | Reduction of head CT <sup>g</sup> imaging (OR 0.913; 95% CI 0.842-0.991) and body CT <sup>g</sup> imaging (OR 0.886; 95% CI 0.828-0.948) but no significant changes in echocardiogram, chest X-ray, or ankle X-ray testing across 12 EDs |

|  | Study                   | Location               | Setting         | Health information exchange type | Study type      | Risk of bias   | Direction of result(s) | Outcome(s) assessed      | Results of health information exchange                                                                                                                                                                                       |
|--|-------------------------|------------------------|-----------------|----------------------------------|-----------------|----------------|------------------------|--------------------------|------------------------------------------------------------------------------------------------------------------------------------------------------------------------------------------------------------------------------|
|  | Lammers et al 2014 [52] | California and Florida | ED              | Varied                           | XS <sup>h</sup> | L <sup>d</sup> | Beneficial             | Reimaging in ED          | Reduced probability of repeat CT <sup>g</sup> (-8.7%; 95% CI -14.7% to -2.7%), ultrasound (-9.1%; 95% CI -17.2% to -1.1%), and chest X-ray (-13.0%; 95% CI -18.3% to -7.7%) ordering in hospitals that had HIE participation |
|  | Mäenpää et al 2011 [23] | Tampere, Finland       | OP <sup>a</sup> | Q <sup>b</sup>                   | RC <sup>c</sup> | L <sup>d</sup> | Beneficial             | Use of radiology testing | Reduction in radiologic testing: 16.4% reduction for primary care physicians and 11.0% reduction for specialist physicians                                                                                                   |
|  | Ross et al 2013 [24]    | Mesa County, Colorado  | OP <sup>a</sup> | Q <sup>b</sup>                   | RC <sup>c</sup> | L <sup>d</sup> | None                   | Use of radiology testing | No statistically significant reduction in the rate of radiologic testing                                                                                                                                                     |
|  | Tzeel et al 2011 [26]   | Milwaukee, Wisconsin   | ED              | Q <sup>b</sup>                   | RC <sup>c</sup> | L <sup>d</sup> | Beneficial             | ED visit costs           | 22% decreased diagnostic radiology ordering and 52% reduced CT <sup>g</sup> scan ordering (statistical significance not reported) when HIE was used in ED                                                                    |

|                            | Study                      | Location           | Setting          | Health information exchange type | Study type      | Risk of bias   | Direction of result(s) | Outcome(s) assessed      | Results of health information exchange                                                                                                                                                    |
|----------------------------|----------------------------|--------------------|------------------|----------------------------------|-----------------|----------------|------------------------|--------------------------|-------------------------------------------------------------------------------------------------------------------------------------------------------------------------------------------|
|                            | Winden et al 2014 [55]     | Minnesota          | ED               | Q <sup>b</sup>                   | CS <sup>e</sup> | M <sup>f</sup> | Beneficial             | Use of radiology testing | 453 instances of duplicate radiology testing averted in 1488 patient encounters                                                                                                           |
| <b>Hospital admissions</b> |                            |                    |                  |                                  |                 |                |                        |                          |                                                                                                                                                                                           |
|                            | Ben-Assuli et al 2013 [29] | Israel             | HMO <sup>i</sup> | Q <sup>b</sup>                   | RC <sup>c</sup> | L <sup>d</sup> | Beneficial             | Hospital admissions      | Viewing medical history via electronic health record (EHR) decreased possibly redundant admissions, with even greater reductions of 48% at 7 days when information was accessed using HIE |
|                            | Ben-Assuli et al 2013 [56] | Israel             | HMO <sup>i</sup> | Q <sup>b</sup>                   | RC <sup>c</sup> | L <sup>d</sup> | Beneficial             | Hospital admissions      | Viewing medical history via EHR decreased possibly redundant admissions, with even greater reductions of 6.0% at 7 days when information was accessed using HIE                           |
|                            | Frisse et al 2012 [25]     | Memphis, Tennessee | ED               | Q <sup>b</sup>                   | RC <sup>c</sup> | L <sup>d</sup> | Beneficial             | Hospital admissions      | US \$1.07 million annual savings, with 97.6% due to reduced admissions                                                                                                                    |





|                                | Study                   | Location                   | Setting         | Health information exchange type | Study type      | Risk of bias   | Direction of result(s) | Outcome(s) assessed             | Results of health information exchange                                                                       |
|--------------------------------|-------------------------|----------------------------|-----------------|----------------------------------|-----------------|----------------|------------------------|---------------------------------|--------------------------------------------------------------------------------------------------------------|
|                                | Carr et al 2014 [54]    | Charleston, South Carolina | ED              | Q <sup>b</sup>                   | CS <sup>e</sup> | M <sup>f</sup> | Beneficial             | Consultation                    | US \$4000 in savings over 3 months through averted consultations in EDs                                      |
|                                | Mäenpää et al 2011 [23] | Tampere, Finland           | OP <sup>a</sup> | Q <sup>b</sup>                   | RC <sup>c</sup> | L <sup>d</sup> | Mixed                  | Referral ordering               | Increased referrals by primary care physicians (43.6%) and specialists (12.8%)                               |
| <b>ED costs</b>                |                         |                            |                 |                                  |                 |                |                        |                                 |                                                                                                              |
|                                | Frisse et al 2012 [25]  | Memphis, Tennessee         | ED              | Q <sup>b</sup>                   | RC <sup>c</sup> | L <sup>d</sup> | Beneficial             | Overall cost                    | US \$1.07 million annual savings, with 97.6% due to reduced admissions                                       |
|                                | Tzeel et al 2011 [26]   | Milwaukee, Wisconsin       | ED              | Q <sup>b</sup>                   | RC <sup>c</sup> | L <sup>d</sup> | Beneficial             | ED visit costs                  | US \$29 per ED visit less expenditures, driven by reduced laboratory testing                                 |
| <b>Public health reporting</b> |                         |                            |                 |                                  |                 |                |                        |                                 |                                                                                                              |
|                                | Magnus et al 2012 [34]  | Louisiana                  | PH <sup>k</sup> | D <sup>j</sup>                   | RC <sup>c</sup> | L <sup>d</sup> | Beneficial             | Follow-up care for HIV patients | Increased identification of needed follow-up care of 419 HIV patients, with 85% having actual follow-up care |





|  | <b>Study</b>         | <b>Location</b>         | <b>Setting</b>  | <b>Health information exchange type</b> | <b>Study type</b> | <b>Risk of bias</b> | <b>Direction of result(s)</b> | <b>Outcome(s) assessed</b> | <b>Results of health information exchange</b>                                                                                                                                                                                                                                                                                                                  |
|--|----------------------|-------------------------|-----------------|-----------------------------------------|-------------------|---------------------|-------------------------------|----------------------------|----------------------------------------------------------------------------------------------------------------------------------------------------------------------------------------------------------------------------------------------------------------------------------------------------------------------------------------------------------------|
|  | Kern et al 2012 [37] | Hudson Valley, New York | OP <sup>a</sup> | Q <sup>b</sup>                          | RC <sup>c</sup>   | L <sup>d</sup>      | Beneficial                    | Clinical quality measures  | For a benchmark group of clinical quality measures believed to be amenable to HIE, users of HIE had a higher proportion exceeding mean clinical quality measure performance at baseline (57% vs 48%) that increased further after HIE became available (64% vs 49%), with increase before and after availability of HIE statistically significant ( $P<.001$ ) |

|  | <b>Study</b>              | <b>Location</b>                    | <b>Setting</b>  | <b>Health information exchange type</b> | <b>Study type</b> | <b>Risk of bias</b> | <b>Direction of result(s)</b> | <b>Outcome(s) assessed</b> | <b>Results of health information exchange</b>                                                                                                                                                                                                                                                                                                                                                                |
|--|---------------------------|------------------------------------|-----------------|-----------------------------------------|-------------------|---------------------|-------------------------------|----------------------------|--------------------------------------------------------------------------------------------------------------------------------------------------------------------------------------------------------------------------------------------------------------------------------------------------------------------------------------------------------------------------------------------------------------|
|  | Nagykaldi et al 2014 [38] | Norman and Oklahoma City, Oklahoma | OP <sup>a</sup> | Q <sup>b</sup>                          | RC <sup>c</sup>   | M <sup>f</sup>      | Beneficial                    | Clinical quality measures  | Improved documentation and delivery of preventive services for mammography screening (21.1-57.1%, <i>P</i> <.01), colonoscopy screening (31.7-53.8%, <i>P</i> <.01), pneumococcal vaccine administration (39.1-50.6%, <i>P</i> <.01), and influenza vaccine administration (22.7-41.7%, <i>P</i> <.01). Also found that medication reconciliation completion improved from 35.3% to 44.9% ( <i>P</i> <.001). |

|                             | Study                       | Location       | Setting         | Health information exchange type | Study type      | Risk of bias   | Direction of result(s) | Outcome(s) assessed                                     | Results of health information exchange                                                                                                                                                                                                                              |
|-----------------------------|-----------------------------|----------------|-----------------|----------------------------------|-----------------|----------------|------------------------|---------------------------------------------------------|---------------------------------------------------------------------------------------------------------------------------------------------------------------------------------------------------------------------------------------------------------------------|
|                             | Willis et al 2013 [50]      | North Carolina | OP <sup>a</sup> | Q <sup>b</sup>                   | RCT             | M <sup>f</sup> | Beneficial             | Documentation and medication reconciliation             | HIE data used in a clinical decision support intervention able to detect medication adherence problems in 8 categories of drugs but did not show any benefit in improving adherence by patients in taking medications prescribed based on evidence-based guidelines |
| <b>Other aspects of HIE</b> |                             |                |                 |                                  |                 |                |                        |                                                         |                                                                                                                                                                                                                                                                     |
|                             | Feldman and Horan 2011 [39] | Virginia       | G <sup>l</sup>  | D <sup>j</sup>                   | RC <sup>c</sup> | M <sup>f</sup> | Beneficial             | Case processing time for SSD <sup>m</sup> determination | 30% reduction in evaluation time for Social Security Disability claims                                                                                                                                                                                              |
|                             | Shapiro et al 2013 [40]     | New York       | ED              | Q <sup>b</sup>                   | RC <sup>c</sup> | M <sup>f</sup> | Beneficial             | Identification of frequent ED users                     | 20.3% increase in identifying frequent ED users compared with site-specific data                                                                                                                                                                                    |

|  | Study                     | Location | Setting        | Health information exchange type | Study type      | Risk of bias   | Direction of result(s) | Outcome(s) assessed                     | Results of health information exchange                                                                                                                                                                            |
|--|---------------------------|----------|----------------|----------------------------------|-----------------|----------------|------------------------|-----------------------------------------|-------------------------------------------------------------------------------------------------------------------------------------------------------------------------------------------------------------------|
|  | Vest and Miller 2011 [41] | US       | H <sup>n</sup> | Varied                           | XS <sup>h</sup> | L <sup>d</sup> | Beneficial             | Patient satisfaction with hospital care | Communication and satisfaction (based on the Hospital Consumer Assessment of Healthcare Providers and Systems survey) higher in hospitals that implemented HIE compared with those that proposed to implement HIE |

<sup>a</sup>OP: outpatient

<sup>b</sup>Q: query

<sup>c</sup>RC: retrospective cohort

<sup>d</sup>L: low

<sup>e</sup>CS: case series

<sup>f</sup>M: moderate

<sup>g</sup>CT: computing tomography

<sup>h</sup>XS: cross sectional

<sup>i</sup>HMO: health maintenance organization

<sup>j</sup>D: directed

<sup>k</sup>PH: public health

<sup>l</sup>G: government

<sup>m</sup>SSD: Social Security Disability

<sup>n</sup>H: hospital
