# Supplementary material for: Outcomes From Health Information Exchange: Systematic Review and Future Research Needs
Source: PubMed Central journal article supplement (PMC4704923; doi:10.2196/medinform.5215), 2015-12-15
Supplement: medinform_v3i4e39_app2.pdf [file medinform_v3i4e39_app2.pdf]

**Multimedia Appendix 2.** Patient and clinician survey perceptions of health information exchange.

| Study                   | Location                        | Setting                   | Health information exchange type | Study type                  | Risk of bias   | Direction of result(s) | Perception(s) assessed                                       | Results                                                                                                                                  |
|-------------------------|---------------------------------|---------------------------|----------------------------------|-----------------------------|----------------|------------------------|--------------------------------------------------------------|------------------------------------------------------------------------------------------------------------------------------------------|
| Afilalo et al 2007 [51] | Montreal, Canada                | Emergency department (ED) | D <sup>a</sup>                   | Randomized controlled trial | M <sup>b</sup> | Beneficial             | Outcomes improved, better patient management                 | Family physicians reported improved patient management and follow-up with exchanged summary of ED visit.                                 |
| Altman et al 2012 [42]  | New York                        | ED                        | D <sup>a</sup>                   | XS <sup>c</sup>             | M <sup>b</sup> | Beneficial             | Primary care provider notification of ED admission/discharge | Primary care physicians reported enhanced awareness and improved communication and follow-up after ED admission/discharge.               |
| Campion et al 2012 [43] | Rochester and Buffalo, New York | OP <sup>d</sup>           | Both                             | XS <sup>c</sup>             | M <sup>b</sup> | Beneficial             | Physician satisfaction of push vs pull                       | Physicians reported satisfaction with both push and pull health information exchange, with higher satisfaction for push.                 |
| Chang et al 2010 [44]   | Indiana                         | OP <sup>d</sup>           | Q <sup>e</sup>                   | XS <sup>c</sup>             | M <sup>b</sup> | Beneficial             | Physician satisfaction with electronic laboratory reports    | Physicians more satisfied with electronic laboratory reports than paper-based reports.                                                   |
| Kaushal et al 2010 [45] | Massachusetts                   | ED                        | D <sup>a</sup>                   | XS <sup>c</sup>             | H <sup>f</sup> | Mixed                  | Impact of providing pharmacy information                     | Providing pharmacy information to physicians in the ED improved knowledge and gaps but was not felt to reduce time or be worth the cost. |

| Study                  | Location       | Setting         | Health information exchange type | Study type      | Risk of bias   | Direction of result(s) | Perception(s) assessed                             | Results                                                                                                                                        |
|------------------------|----------------|-----------------|----------------------------------|-----------------|----------------|------------------------|----------------------------------------------------|------------------------------------------------------------------------------------------------------------------------------------------------|
| Maass et al 2008 [46]  | Finland        | OP <sup>d</sup> | Q <sup>e</sup>                   | XS <sup>c</sup> | H <sup>f</sup> | Beneficial             | Improvements in care                               | Perceived improvement in ambulatory care function, resulting in faster acquisition and treatment decisions.                                    |
| Machan et al 2006 [47] | Tyrol, Austria | OP <sup>d</sup> | D <sup>a</sup>                   | XS <sup>c</sup> | L <sup>g</sup> | Beneficial             | Physician satisfaction with discharge reports sent | Improved care and decreased work for filing and archiving discharge reports with health information exchange.                                  |
| Park et al 2013 [48]   | South Korea    | OP <sup>d</sup> | D <sup>a</sup>                   | XS <sup>c</sup> | L <sup>g</sup> | Beneficial             | Patient perceptions of data transferred            | Improved patient satisfaction when records were transferred via health information exchange over patients delivering paper records themselves. |

<sup>a</sup>D: directed

<sup>b</sup>M: moderate

<sup>c</sup>XS: cross sectional

<sup>d</sup>OP: outpatient

<sup>e</sup>Q: query

<sup>f</sup>H: high

<sup>g</sup>L: low
